# Supplementary material for: Evolution of KaiC-Dependent Timekeepers: A Proto-circadian Timing Mechanism Confers Adaptive Fitness in the Purple Bacterium Rhodopseudomonas palustris
Source: PubMed Central journal article supplement (PMC4794148; doi:10.1371/journal.pgen.1005922), 2016-03-16
Supplement: pgen.1005922.s004.pdf [file pgen.1005922.s004.pdf]

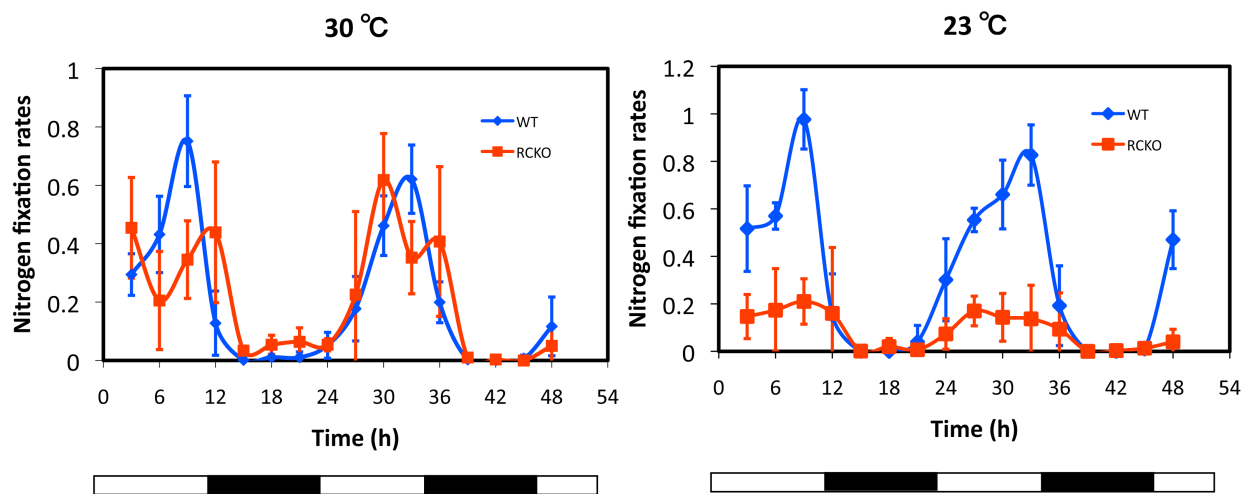

**Figure S3. Daily patterns of nitrogen fixation in WT vs. RCKO strains.** These data are replotted from Fig. 1 with all three replicate cultures averaged together. Data are mean +/- S.D. (n = 6).
