# Supplementary material for: Evolution of KaiC-Dependent Timekeepers: A Proto-circadian Timing Mechanism Confers Adaptive Fitness in the Purple Bacterium Rhodopseudomonas palustris
Source: PubMed Central journal article supplement (PMC4794148; doi:10.1371/journal.pgen.1005922), 2016-03-16
Supplement: pgen.1005922.s005.pdf [file pgen.1005922.s005.pdf]

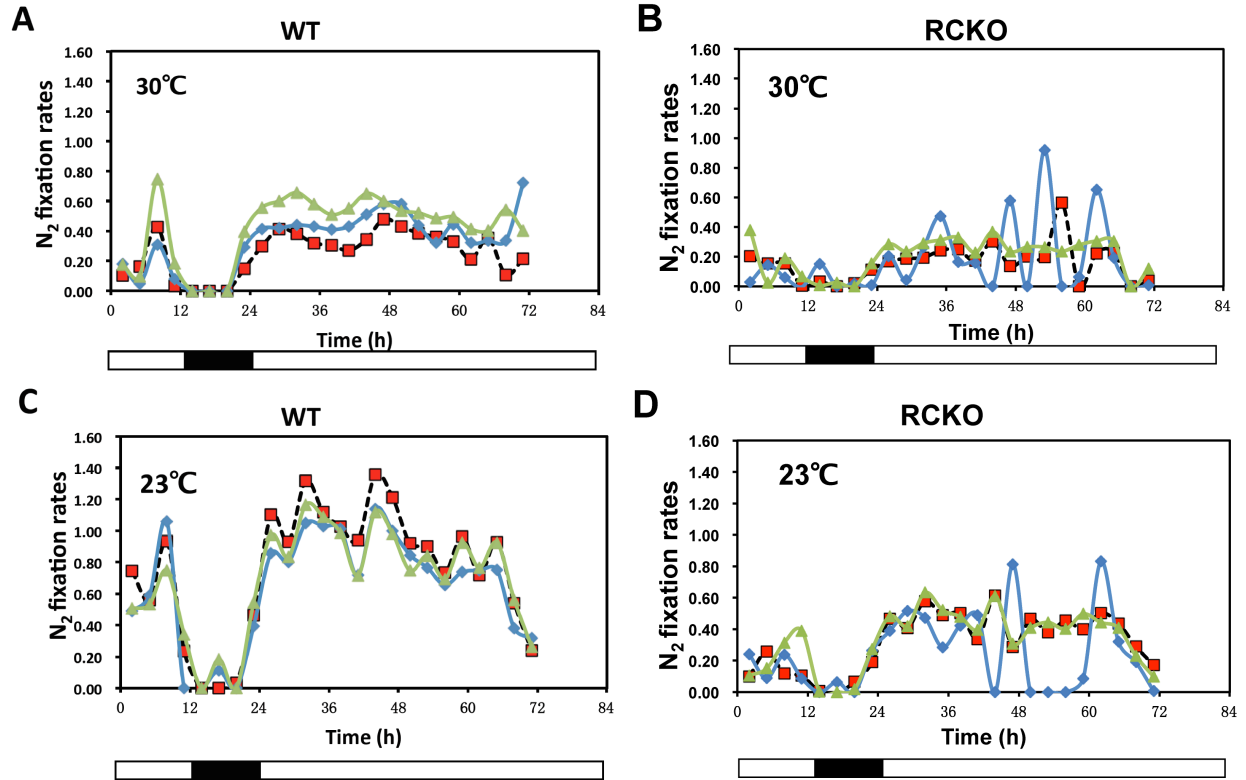

**Figure S4. Lack of robust persistence of the nitrogen fixation rhythm in LL in individual cultures.** Each trace represents the nitrogen fixation activity of each individual culture from the three replicates of the experiment depicted in Figure 3. **A**, WT at 30°C; **B**, RCKO at 30°C; **C**, WT at 23°C; **D**, RCKO at 23°C.
