# Supplementary material for: Evolution of KaiC-Dependent Timekeepers: A Proto-circadian Timing Mechanism Confers Adaptive Fitness in the Purple Bacterium Rhodopseudomonas palustris
Source: PubMed Central journal article supplement (PMC4794148; doi:10.1371/journal.pgen.1005922), 2016-03-16
Supplement: pgen.1005922.s009.pdf [file pgen.1005922.s009.pdf]

**Table S1. Bacterial strains used in this study**

| Strain                             | Genotype and use                                                                                                          | Reference  |
|------------------------------------|---------------------------------------------------------------------------------------------------------------------------|------------|
| <i>E.Coli</i> S17-1                | A conjugative donor strain [ <i>thi pro hdsR hdsM+ recA</i> ; chromosomal insertion of RP4-2 (Tc::Mu Km::Tn7)].           | [45, 48]   |
| <i>R. palustris</i> TIE-1          | Served as the wild type strain of <i>R. palustris</i> TIE-1.                                                              | [30]       |
| RCKO                               | <i>kaiC<sup>Rp</sup></i> knockout strain (1674bp deleted from <i>kaiC<sup>Rp</sup></i> gene in <i>R. palustris</i> TIE-1) | This study |
| RCKO-FLAG <i>kaiC<sup>Rp</sup></i> | A FLAG-tagged <i>kaiC<sup>Rp</sup></i> ectopically inserted into the genome of RCKO.                                      | This study |
| RCKO-HA <i>kaiC<sup>Rp</sup></i>   | A HA-tagged <i>kaiC<sup>Rp</sup></i> ectopically inserted into the genome of RCKO.                                        | This study |
