# Supplementary material for: Evolution of KaiC-Dependent Timekeepers: A Proto-circadian Timing Mechanism Confers Adaptive Fitness in the Purple Bacterium Rhodopseudomonas palustris
Source: PubMed Central journal article supplement (PMC4794148; doi:10.1371/journal.pgen.1005922), 2016-03-16
Supplement: pgen.1005922.s012.pdf [file pgen.1005922.s012.pdf]

**Table S4. Time series data for Figure 1****30°C**

| Time | WT1  | WT2  | WT3  | RCKO1 | RCKO2 | RCKO3 |
|------|------|------|------|-------|-------|-------|
| 3    | 0.32 | 0.35 | 0.21 | 0.40  | 0.31  | 0.65  |
| 6    | 0.40 | 0.58 | 0.32 | 0.07  | 0.39  | 0.15  |
| 9    | 0.80 | 0.88 | 0.58 | 0.37  | 0.20  | 0.46  |
| 12   | 0.14 | 0.01 | 0.23 | 0.64  | 0.51  | 0.17  |
| 15   | 0.01 | 0.00 | 0.00 | 0.05  | 0.02  | 0.03  |
| 18   | 0.00 | 0.01 | 0.02 | 0.04  | 0.09  | 0.03  |
| 21   | 0.03 | 0.00 | 0.00 | 0.10  | 0.01  | 0.08  |
| 24   | 0.04 | 0.01 | 0.10 | 0.03  | 0.06  | 0.07  |
| 27   | 0.05 | 0.21 | 0.27 | 0.55  | 0.00  | 0.13  |
| 30   | 0.57 | 0.44 | 0.37 | 0.67  | 0.44  | 0.75  |
| 33   | 0.63 | 0.73 | 0.50 | 0.21  | 0.45  | 0.39  |
| 36   | 0.21 | 0.12 | 0.26 | 0.62  | 0.12  | 0.48  |
| 39   | 0.01 | 0.00 | 0.00 | 0.00  | 0.01  | 0.02  |
| 42   | 0.00 | 0.00 | 0.00 | 0.00  | 0.01  | 0.00  |
| 45   | 0.00 | 0.02 | 0.00 | 0.00  | 0.00  | 0.00  |
| 48   | 0.01 | 0.13 | 0.21 | 0.02  | 0.13  | 0.00  |

**23°**

| Time | WT1  | WT2  | WT3  | RCKO1 | RCKO2 | RCKO3 |
|------|------|------|------|-------|-------|-------|
| 3    | 0.34 | 0.51 | 0.70 | 0.12  | 0.07  | 0.25  |
| 6    | 0.56 | 0.52 | 0.63 | 0.35  | 0.00  | 0.17  |
| 9    | 0.92 | 0.89 | 1.12 | 0.12  | 0.20  | 0.31  |
| 12   | 0.00 | 0.12 | 0.34 | 0.00  | 0.00  | 0.48  |
| 15   | 0.00 | 0.00 | 0.00 | 0.00  | 0.00  | 0.00  |
| 18   | 0.00 | 0.00 | 0.00 | 0.00  | 0.06  | 0.00  |
| 21   | 0.12 | 0.00 | 0.00 | 0.00  | 0.00  | 0.02  |
| 24   | 0.46 | 0.12 | 0.32 | 0.12  | 0.10  | 0.00  |
| 27   | 0.61 | 0.53 | 0.52 | 0.24  | 0.12  | 0.15  |
| 30   | 0.82 | 0.62 | 0.54 | 0.13  | 0.05  | 0.25  |
| 33   | 0.90 | 0.90 | 0.68 | 0.05  | 0.06  | 0.30  |
| 36   | 0.27 | 0.00 | 0.31 | 0.00  | 0.01  | 0.27  |
| 39   | 0.00 | 0.00 | 0.00 | 0.00  | 0.00  | 0.00  |
| 42   | 0.00 | 0.00 | 0.00 | 0.00  | 0.01  | 0.00  |
| 45   | 0.00 | 0.03 | 0.00 | 0.03  | 0.01  | 0.00  |
| 48   | 0.39 | 0.41 | 0.61 | 0.00  | 0.10  | 0.02  |
