# Supplementary material for: Evolution of KaiC-Dependent Timekeepers: A Proto-circadian Timing Mechanism Confers Adaptive Fitness in the Purple Bacterium Rhodopseudomonas palustris
Source: PubMed Central journal article supplement (PMC4794148; doi:10.1371/journal.pgen.1005922), 2016-03-16
Supplement: pgen.1005922.s015.pdf [file pgen.1005922.s015.pdf]

**Table S7. Time series data for Figure 4D**

| #  | Hours in LL | P-KaiC/total KaiC |
|----|-------------|-------------------|
| 1  | -24         | 0.660             |
| 2  | -18         | 0.932             |
| 3  | -12         | 0.938             |
| 4  | -6          | 0.912             |
| 5  | 0           | 0.615             |
| 6  | 6           | 0.833             |
| 7  | 12          | 0.771             |
| 8  | 18          | 0.814             |
| 9  | 24          | 0.819             |
| 10 | 30          | 0.781             |
| 11 | 36          | 0.832             |
| 12 | 42          | 0.839             |
| 13 | 48          | 0.914             |
